# Supplementary material for: Activity of Mono-, Bi-, and Trimetallic Catalysts Pt-Ni-Cr/C in the Bicyclohexyl Dehydrogenation Reaction
Source: MDPI journal article supplement (doi:10.3390/molecules27238416), 2022-12-01
Supplement: s1 [file s1]

## Activity of Mono-, Bi-, and Trimetallic Catalysts Pt-Ni-Cr/C in the Bicyclohexyl Dehydrogenation Reaction

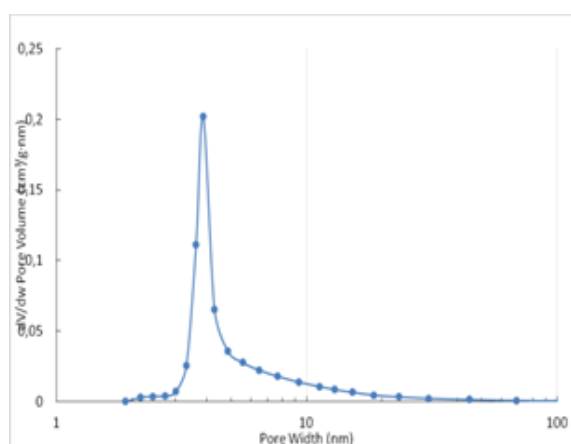

(a)

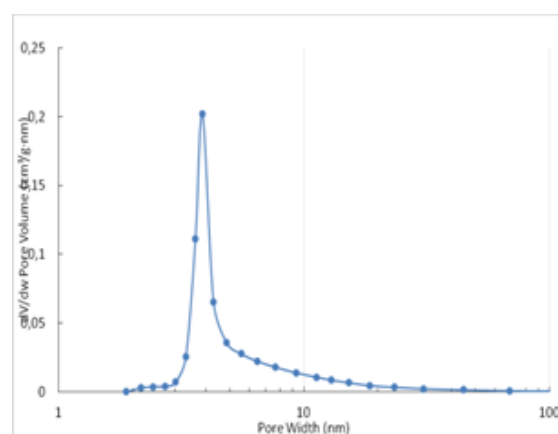

(b)

**Figure S1.** Pore size distributions for Sibunit before (a, C) and after oxidation (b, C<sub>ox</sub>).

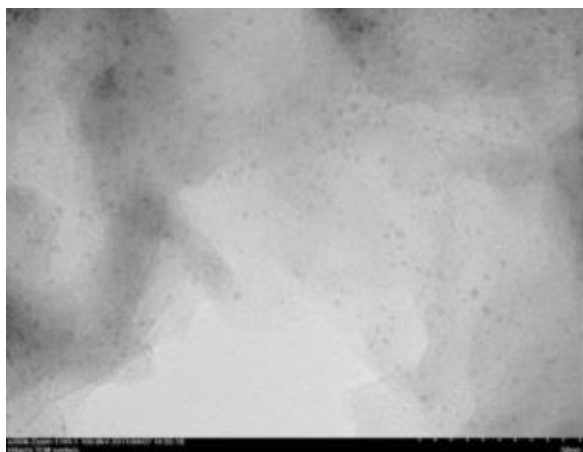

(a)

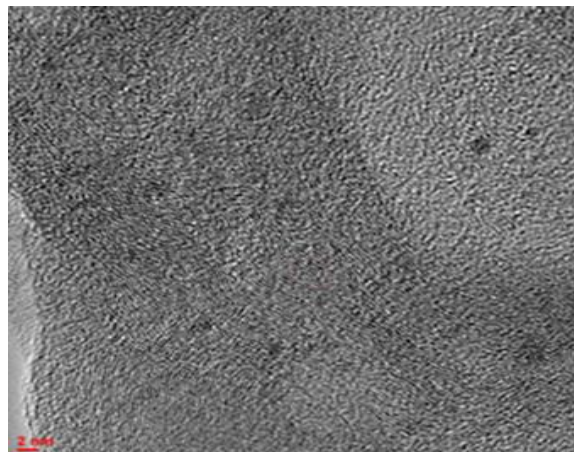

(b)

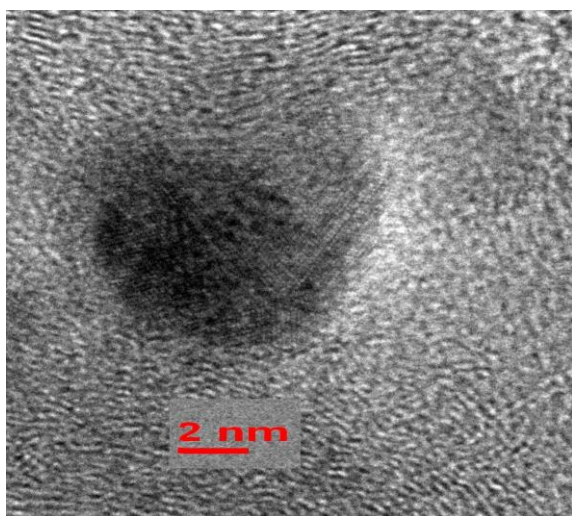

(c)

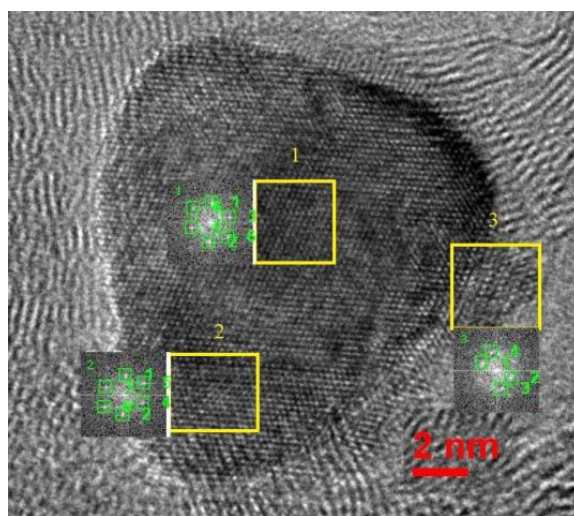

(d)

**Figure S2.** TEM images of catalysts 0.1Pt/C (a), 0.1Pt/1.5Cr/C (b), 0.1Pt/3Ni/C (c), 0.1Pt/1.5Cr/3Ni/C (d).

**Table S1.** XPS data for the catalysts before and after reduction in H<sub>2</sub>.

| Catalyst           | Pt 4f         |    |               |    | Ni2p          |    |               |    | Cr2p          |     |
|--------------------|---------------|----|---------------|----|---------------|----|---------------|----|---------------|-----|
|                    | <i>E</i> , eV | %   |
| 0.1Pt/C            | 71.2          | 21 | 72.0          | 79 | -             | -  | -             | -  | -             | -   |
| 3Ni/C              | -             | -  | -             | -  | 852.5         | 53 | 855.8         | 47 | -             | -   |
| 0.1Pt/3Ni/C        | 71.2          | 91 | 72.0          | 9  | 852.5         | 32 | 855.8         | 68 | -             | -   |
| 0.1Pt(3Ni-1.5Cr)/C | 71.2          | 49 | 72.0          | 51 | 852.5         | 38 | 855.8         | 62 | 577.0         | 100 |
| 0.1Pt/1.5Cr/3Ni/C  | 71.2          | 33 | 72.0          | 67 | 852.5         | 39 | 855.8         | 61 | 577.0         | 100 |

**Table S2.** Temperatures of the maxima at the TPR curves for the studied catalysts.

| Catalyst            | Temperatures of hydrogen uptake |               |               |
|---------------------|---------------------------------|---------------|---------------|
|                     | T = 50–270°C                    | T = 300–450°C | T = 450–850°C |
| C (Sibunit)         | -                               | -             | 680           |
| 0.1Pt/C             | -                               | -             | 640           |
| 3Pt/C               | 270                             | -             | 510           |
| 3Ni/C               | 190                             | 330           | 540           |
| 0.1Pt/3Ni/C         | 270                             | 340           | -             |
| 0.1Pt/(3Ni-1.5Cr)/C | 171                             | 337           | 539           |

**Table S3.** Magnetic properties of the PtNiCr/C catalysts.

| Catalyst                          | Concentration of ferromagnetic Ni, C <sub>m</sub> wt. % |                                   | Size of Ni particles, <i>d</i> , nm | Curie temperature, T <sub>C</sub> , °C |
|-----------------------------------|---------------------------------------------------------|-----------------------------------|-------------------------------------|----------------------------------------|
|                                   | Starting                                                | After treatment in H <sub>2</sub> |                                     |                                        |
| 3Ni/C <sub>ox</sub>               | 0.3                                                     | 1                                 | -                                   | 350                                    |
| 0.1Pt/3Ni/1.5Cr/C <sub>ox</sub>   | 0                                                       | 0.7                               | 5–12                                | 342                                    |
| 0.1Pt/1.5Cr/3Ni/C <sub>ox</sub>   | 1.5                                                     | 2.2                               | 6–17                                | 323                                    |
| 0.1Pt/(3Ni-1.5Cr)/C <sub>ox</sub> | 0.9                                                     | 1.5                               | 7–12                                | 343                                    |
